# Supplementary material for: Intracellular Zn2+ transients modulate global gene expression in dissociated rat hippocampal neurons
Source: PubMed Central journal article supplement (PMC6598991; doi:10.1038/s41598-019-45844-2), 2019-06-28
Supplement: 41598_2019_45844_MOESM4_ESM.pdf [file 41598_2019_45844_MOESM4_ESM.pdf]

| Gene         | log2(Fold change) | "False discovery rate (FDR, padj)" | Base mean expression (normalized read counts per gene) |
|--------------|-------------------|------------------------------------|--------------------------------------------------------|
| Slc30a3      | 0.475139558       | 9.74E-09                           | 1192.447638                                            |
| Aqp4         | 0.47067782        | 9.74E-09                           | 1011.476536                                            |
| Tnc          | 0.463139349       | 2.29E-08                           | 915.7209248                                            |
| Fam107a      | 0.441041252       | 1.71E-07                           | 751.5277721                                            |
| Nes          | 0.433657995       | 3.05E-07                           | 978.6068329                                            |
| Tnfaip8      | 0.418916361       | 1.93E-06                           | 200.1178882                                            |
| Il1r1        | 0.412302167       | 3.29E-06                           | 376.7383423                                            |
| Epha7        | 0.409855283       | 3.54E-07                           | 1272.096249                                            |
| Itpr2        | 0.403637668       | 9.67E-06                           | 265.4931959                                            |
| Mas1         | 0.392569183       | 1.30E-06                           | 1137.471759                                            |
| Tmem71       | 0.391684559       | 1.19E-05                           | 486.829592                                             |
| Plcx2        | 0.386275456       | 1.21E-08                           | 2797.529581                                            |
| Flnc         | 0.385328351       | 1.30E-05                           | 575.3562198                                            |
| Fbln1        | 0.381451534       | 1.43E-05                           | 598.5244939                                            |
| Rgs8         | 0.376990179       | 1.95E-05                           | 794.0888349                                            |
| Sema5a       | 0.374646028       | 8.34E-09                           | 4978.082715                                            |
| Sema3c       | 0.3741508         | 4.38E-06                           | 1603.249445                                            |
| Ptgs2        | 0.368605083       | 2.57E-05                           | 675.871117                                             |
| LOC100361083 | 0.367074037       | 3.57E-05                           | 400.2556586                                            |
| Serpine2     | 0.365678915       | 1.46E-05                           | 1443.13628                                             |
| St18         | 0.36464895        | 1.12E-06                           | 3025.813261                                            |
| Synj2        | 0.35952824        | 2.22E-05                           | 925.8229796                                            |
| Abca1        | 0.356191951       | 1.46E-05                           | 578.7760177                                            |
| Rasgrp1      | 0.355479979       | 1.78E-05                           | 1624.606643                                            |
| Vamp1        | 0.35087973        | 7.06E-07                           | 2372.983515                                            |
| S1pr3        | 0.344827374       | 0.000221585                        | 388.0047463                                            |
| Plec         | 0.343513424       | 1.18E-05                           | 2751.945593                                            |
| Nhlh1        | 0.343045234       | 0.000218509                        | 146.5889897                                            |
| Oprl1        | 0.342408838       | 1.45E-06                           | 1126.253072                                            |
| Rassf4       | 0.342104246       | 0.000160928                        | 120.771047                                             |
| Nefh         | 0.34153831        | 0.000166615                        | 859.2600943                                            |
| Ctnna1       | 0.340062544       | 1.95E-05                           | 1168.461533                                            |
| Penk         | 0.339245293       | 0.000114294                        | 783.1975357                                            |
| Gpr37l1      | 0.33821374        | 0.000280169                        | 206.1715048                                            |
| Cxcl14       | 0.337584832       | 0.000310145                        | 483.5943718                                            |
| Acsbg1       | 0.335873661       | 0.000171169                        | 528.5863447                                            |
| Kcnj10       | 0.328783924       | 0.00044769                         | 382.6172237                                            |
| Kcnv1        | 0.327470122       | 8.68E-05                           | 827.0684487                                            |
| Man1a1       | 0.326450301       | 4.12E-05                           | 1256.662955                                            |
| Igfbpl1      | 0.326019628       | 0.000484853                        | 261.2644343                                            |
| Gja1         | 0.325421088       | 0.00033041                         | 845.6271361                                            |
| Slc39a10     | 0.324437065       | 5.17E-06                           | 3448.41086                                             |
| Gpr158       | 0.324143138       | 5.50E-07                           | 5411.723891                                            |
| Tmbim1       | 0.323503474       | 0.000652218                        | 236.2262795                                            |
| Adcy2        | 0.323352404       | 2.57E-05                           | 1114.575863                                            |
| Abhd4        | 0.322715682       | 1.95E-05                           | 1521.641582                                            |
| Arap2        | 0.322490239       | 0.000398728                        | 372.6596849                                            |
| Nxph4        | 0.320682553       | 0.000741853                        | 278.8816093                                            |

|          |             |             |             |
|----------|-------------|-------------|-------------|
| Wipi1    | 0.319989685 | 1.95E-05    | 815.2965481 |
| Prss35   | 0.31716031  | 4.49E-05    | 89.16487042 |
| Pkp2     | 0.315264872 | 0.000959738 | 254.556821  |
| Prss23   | 0.312989885 | 0.001063078 | 223.0168885 |
| Hr       | 0.310114373 | 0.000342202 | 410.6449571 |
| Pdpn     | 0.310113059 | 0.001089831 | 321.6292922 |
| Csf1     | 0.309605465 | 0.001178813 | 399.0390348 |
| Chst9    | 0.308829494 | 0.000398728 | 119.6177364 |
| Nbl1     | 0.308727066 | 0.001254166 | 401.116623  |
| Tagln2   | 0.307926499 | 0.001196175 | 298.6785756 |
| Atp1a2   | 0.304037775 | 3.48E-05    | 2125.040451 |
| Tacr1    | 0.302227984 | 0.001587078 | 138.5361369 |
| Fmod     | 0.301839426 | 0.001239883 | 163.0057101 |
| Synm     | 0.301598198 | 9.67E-06    | 2310.023622 |
| Hhip     | 0.300824879 | 0.001255129 | 250.1116072 |
| Mmd      | 0.300791432 | 2.48E-06    | 14339.84114 |
| Ace      | 0.300482984 | 0.001139593 | 339.8909928 |
| Itga1    | 0.299467613 | 0.000367317 | 55.50939395 |
| Fam84a   | 0.299461043 | 0.000220351 | 1196.964726 |
| Lrrtm4   | 0.298741311 | 0.000746701 | 433.2799147 |
| Sstr3    | 0.298327045 | 0.000986864 | 506.5280775 |
| Ctsh     | 0.297662212 | 0.001972507 | 279.2443702 |
| Gabrd    | 0.297360479 | 0.002105578 | 248.3142677 |
| Mapk4    | 0.297208856 | 0.000160928 | 904.0424539 |
| Arid5b   | 0.294302564 | 1.95E-05    | 917.860833  |
| Mlc1     | 0.292805664 | 0.001311582 | 800.6252248 |
| Fam129a  | 0.292760548 | 0.000680557 | 87.03153846 |
| Thbs1    | 0.292305413 | 0.002494493 | 298.063122  |
| Epha4    | 0.291769557 | 6.11E-07    | 17242.0853  |
| Prkcg    | 0.291744615 | 6.61E-05    | 16243.78867 |
| Aldh1a1  | 0.291106364 | 0.001587078 | 101.7289523 |
| Chn1     | 0.290155438 | 1.18E-05    | 6535.068983 |
| Sparc    | 0.290112521 | 4.51E-05    | 7163.196571 |
| Anxa6    | 0.289472155 | 0.000412044 | 2739.187529 |
| Serping1 | 0.288943838 | 0.002210767 | 204.380678  |
| Alcam    | 0.288272031 | 7.85E-06    | 3908.916327 |
| Hapl1n1  | 0.287673331 | 0.002727652 | 291.0006834 |
| Slc1a3   | 0.287448223 | 0.002686853 | 4680.084373 |
| Cav1     | 0.286641847 | 0.001119195 | 505.4249658 |
| Megf10   | 0.284737979 | 0.001787173 | 580.8062366 |
| Mt2A     | 0.284724061 | 0.002864233 | 457.5409979 |
| Lrp4     | 0.284215593 | 0.003360514 | 161.3881888 |
| Pdp1     | 0.28217855  | 6.10E-05    | 1042.970185 |
| Oaf      | 0.280509225 | 0.000959738 | 68.60533951 |
| Nedd9    | 0.280404397 | 0.000342202 | 1410.940282 |
| Npy1r    | 0.280314952 | 0.000546485 | 994.0899232 |
| Wipf3    | 0.279558736 | 0.001101336 | 1221.760376 |
| Rnf112   | 0.27953689  | 0.000193671 | 5252.396882 |
| Thy1     | 0.279254506 | 0.003758213 | 5436.630743 |
| Ccnd1    | 0.27756801  | 0.003568054 | 736.1182005 |

|           |             |             |             |
|-----------|-------------|-------------|-------------|
| Banp      | 0.27708958  | 0.002552451 | 491.8446925 |
| Ahnak     | 0.276736764 | 0.001586692 | 467.0026571 |
| Rhbdf1    | 0.276658153 | 0.004712092 | 306.6719933 |
| Shisa6    | 0.276044972 | 0.000949199 | 1345.646408 |
| Sox2      | 0.27476881  | 0.004240407 | 326.4247447 |
| Fndc3c1   | 0.274766569 | 0.003842614 | 244.3328367 |
| Ros1      | 0.273056303 | 0.003581565 | 115.6389593 |
| Fgfr3     | 0.272999362 | 0.005340807 | 359.0028766 |
| Kcnab2    | 0.272723266 | 0.000636223 | 2029.431637 |
| Sorcs3    | 0.272304699 | 1.56E-05    | 3086.992175 |
| Spred1    | 0.271647536 | 0.000171169 | 1393.08714  |
| Slc15a2   | 0.271197859 | 0.003004961 | 78.21773958 |
| Gria3     | 0.271049691 | 0.002039889 | 1218.575925 |
| Chrm3     | 0.270938614 | 0.000310145 | 1370.801041 |
| Cap2      | 0.270400918 | 3.63E-05    | 3164.577969 |
| Pls3      | 0.270004217 | 0.001139593 | 933.788154  |
| Gad1      | 0.267213834 | 1.46E-05    | 12878.17868 |
| Gli3      | 0.267138901 | 0.005951774 | 131.5727379 |
| Plekhg1   | 0.266447335 | 4.42E-05    | 2153.126472 |
| Mxra8     | 0.266283818 | 0.006316149 | 119.8021389 |
| Vim       | 0.265594072 | 0.006316149 | 7083.400956 |
| Nrxn3     | 0.264223553 | 0.000652218 | 4079.167762 |
| Me1       | 0.263872125 | 0.000188817 | 3122.641373 |
| Calb1     | 0.262452252 | 0.000131868 | 3309.344208 |
| Rhoc      | 0.262156561 | 0.008473959 | 222.1771489 |
| Gfap      | 0.260546965 | 0.007872351 | 4659.976231 |
| Hivep2    | 0.259417635 | 3.73E-05    | 20349.47801 |
| Slc6a1    | 0.259409027 | 0.00013833  | 10645.50582 |
| Plce1     | 0.259277173 | 0.00247166  | 555.4815475 |
| Kctd4     | 0.258602201 | 0.007561159 | 377.2942184 |
| Ptprg     | 0.258530697 | 8.29E-06    | 5166.02607  |
| Kif1c     | 0.258138012 | 0.002114059 | 1040.326935 |
| Htra1     | 0.25753098  | 0.003973489 | 77.81738929 |
| Ucp2      | 0.257185614 | 0.007872351 | 100.6774754 |
| Nefm      | 0.256024679 | 0.000546315 | 16630.66103 |
| Hspa12a   | 0.2556549   | 1.00E-07    | 12181.38333 |
| Gstt3     | 0.255265515 | 0.00273804  | 58.05723695 |
| Fabp7     | 0.255094082 | 0.01118857  | 2785.445833 |
| Srebf1    | 0.254923027 | 0.003983878 | 1253.273696 |
| Crhbp     | 0.254876337 | 0.001586692 | 886.7681836 |
| Ppap2b    | 0.25463837  | 0.003360514 | 1066.196082 |
| C1ql3     | 0.254248384 | 0.002371219 | 562.0540277 |
| Igsf11    | 0.253787796 | 0.011465658 | 295.0259606 |
| Notch2    | 0.252728949 | 0.000365851 | 1328.8438   |
| Fgfrl1    | 0.252306545 | 0.009367764 | 119.8785782 |
| Vcan      | 0.251776756 | 0.001416265 | 1999.923064 |
| Nacc2     | 0.251433219 | 0.009123924 | 452.4004317 |
| Gad2      | 0.251117461 | 0.00022644  | 5247.912619 |
| Slc2a13   | 0.250530921 | 4.29E-07    | 4945.111252 |
| Hist1h2bh | 0.250273534 | 0.012629597 | 1432.957597 |

|            |             |             |             |
|------------|-------------|-------------|-------------|
| Tnr        | 0.250199641 | 0.003624003 | 1675.352834 |
| Grb14      | 0.249812635 | 0.005859516 | 451.9045659 |
| Cdkn1a     | 0.249576849 | 0.005782698 | 511.7029457 |
| Grid2      | 0.24874764  | 0.01392468  | 160.1117324 |
| Htr3a      | 0.248643024 | 0.013626478 | 185.8415738 |
| Hivep3     | 0.248242718 | 0.000304403 | 2117.103825 |
| Htr1a      | 0.247494442 | 0.014383873 | 221.2803062 |
| Prkd2      | 0.246233147 | 0.010325575 | 484.677285  |
| Lrrc4c     | 0.245678238 | 0.000232013 | 2533.997771 |
| Nab2       | 0.2453203   | 0.013309622 | 663.3031072 |
| Sspn       | 0.245231995 | 0.012092199 | 96.25429945 |
| Serinc3    | 0.244393388 | 7.28E-05    | 8532.499224 |
| Gabra3     | 0.242853904 | 0.010503182 | 451.8821364 |
| Kpna2      | 0.242531338 | 0.002548495 | 1352.286925 |
| Abcb1b     | 0.241922867 | 0.012602245 | 428.3994885 |
| S100b      | 0.241912477 | 0.003888324 | 1195.197082 |
| Stat1      | 0.241654632 | 0.008602892 | 399.781619  |
| Lgi1       | 0.241559929 | 0.000156144 | 5248.988042 |
| Lrrn1      | 0.241419382 | 2.87E-05    | 2533.716474 |
| Ryr2       | 0.241039641 | 0.000652218 | 13374.75238 |
| Akap5      | 0.240891086 | 0.006975891 | 650.2251446 |
| Gldc       | 0.240012938 | 0.018485231 | 244.7550032 |
| Lamb2      | 0.23912081  | 0.014819317 | 362.6372848 |
| Zdhhc23    | 0.238738451 | 0.017435184 | 233.2870033 |
| Ltbp1      | 0.23827589  | 0.019754558 | 197.4569728 |
| Ptk2b      | 0.238272545 | 0.016040789 | 7679.919524 |
| Prickle1   | 0.237574669 | 0.000815939 | 2447.633272 |
| Enc1       | 0.234523175 | 1.96E-05    | 40377.27111 |
| Plekhg5    | 0.233559662 | 0.000941844 | 4066.87784  |
| Syt17      | 0.233491498 | 0.019669638 | 1685.221763 |
| Plekhd1    | 0.233279378 | 0.018133943 | 93.68890963 |
| Pde5a      | 0.233178921 | 0.01214277  | 437.4275036 |
| Alk        | 0.232941424 | 0.023458612 | 184.7767723 |
| Pragmin    | 0.232486619 | 0.006898375 | 775.6385589 |
| Luzp1      | 0.232453027 | 0.001592339 | 1184.709587 |
| Reep3      | 0.232450728 | 0.017435184 | 305.7544711 |
| Mertk      | 0.231877614 | 0.024512513 | 152.7888418 |
| Trak2      | 0.23151936  | 7.20E-05    | 10907.9105  |
| Slc25a18   | 0.23101858  | 0.007510619 | 68.00657054 |
| Sez6       | 0.230915796 | 0.000484853 | 24793.47722 |
| Ptprv      | 0.230694771 | 0.022250269 | 153.5480913 |
| Ndrg2      | 0.230396922 | 0.025363413 | 2253.938382 |
| Tuba4a     | 0.229829277 | 0.02091666  | 6990.166704 |
| Lgals3     | 0.229336957 | 0.022015994 | 136.9123645 |
| Slc1a1     | 0.229270811 | 7.37E-05    | 3144.533311 |
| Smpdl3b    | 0.22835934  | 0.020433217 | 525.1962206 |
| Prrt2      | 0.227902097 | 0.000243136 | 3415.14277  |
| Chgb       | 0.227542508 | 0.019921102 | 16217.12875 |
| Myo1e      | 0.226968556 | 0.013165287 | 520.7121493 |
| RGD1309079 | 0.226871915 | 0.018107757 | 446.48984   |

|              |             |             |             |
|--------------|-------------|-------------|-------------|
| Slc12a4      | 0.226504257 | 0.021808237 | 305.949839  |
| Cpne6        | 0.226384084 | 0.002284859 | 3224.094925 |
| Snap25       | 0.226226859 | 1.12E-05    | 25934.17542 |
| Slitrk4      | 0.226154377 | 0.00039058  | 2087.203595 |
| Ptn          | 0.226078287 | 0.008489965 | 1920.477828 |
| Gpm6b        | 0.225814596 | 0.000242399 | 7734.253798 |
| Map3k5       | 0.225751984 | 0.011910377 | 524.0930797 |
| Sort1        | 0.225539666 | 1.18E-05    | 14073.42438 |
| Trim9        | 0.22465384  | 2.87E-05    | 8669.343059 |
| Gabre        | 0.224370271 | 0.028218263 | 162.4247261 |
| Bmper        | 0.224218125 | 0.014103773 | 63.19624302 |
| Lynx1        | 0.223840671 | 0.024912427 | 2072.964082 |
| Pon2         | 0.223401138 | 0.031846159 | 180.1238344 |
| Clstn2       | 0.223158579 | 0.02663492  | 4287.567519 |
| Spon1        | 0.22273839  | 0.023453498 | 572.9670753 |
| Dgka         | 0.222709717 | 0.000654731 | 1906.583698 |
| Smc6         | 0.222565848 | 0.000416341 | 3306.883732 |
| Itgb5        | 0.222519592 | 0.032738786 | 228.5819104 |
| Vcam1        | 0.222329242 | 0.028288746 | 130.2168126 |
| Rfdw2        | 0.222265661 | 0.000527227 | 1968.547118 |
| Kcnq3        | 0.221997753 | 0.032738786 | 5104.151967 |
| Fam212b      | 0.221547944 | 0.033115021 | 1027.398097 |
| Gsta1        | 0.221538162 | 0.011227678 | 938.8913309 |
| Camk4        | 0.221160331 | 0.02038614  | 932.593913  |
| Apc          | 0.221129633 | 0.000652218 | 34051.19008 |
| Plp1         | 0.220959707 | 0.01964324  | 617.3248773 |
| Carhsp1      | 0.220953206 | 0.029741264 | 327.3682218 |
| Krcc1        | 0.220724349 | 0.033869211 | 199.1804368 |
| Pld2         | 0.220097052 | 0.032769233 | 146.7994864 |
| Ss18         | 0.219853725 | 0.004011882 | 982.572538  |
| Cp           | 0.219813166 | 0.024452038 | 584.5745873 |
| Ephx1        | 0.218687887 | 0.015016907 | 692.4097333 |
| Fam131b      | 0.218584704 | 0.000389519 | 4669.752464 |
| Slc8a2       | 0.218490922 | 0.003599623 | 8604.993812 |
| Sntg1        | 0.218369024 | 0.037234085 | 171.4679819 |
| Myadm        | 0.217976592 | 0.006001738 | 9742.927649 |
| Slc16a11     | 0.217867791 | 0.037862123 | 238.7063843 |
| Caskin2      | 0.217680961 | 0.018711374 | 69.466285   |
| Cav2         | 0.217676712 | 0.027022205 | 83.65523214 |
| Gbp2         | 0.21727239  | 0.032738786 | 112.912631  |
| Il1rap       | 0.217254658 | 0.018651673 | 543.4526461 |
| Lin7b        | 0.216863432 | 0.026393677 | 513.9270974 |
| Arhgap25     | 0.216771628 | 0.019585331 | 73.16496519 |
| Dok5         | 0.216581567 | 0.01356512  | 1064.458017 |
| LOC100910973 | 0.216273848 | 0.03877987  | 140.0867029 |
| Slc32a1      | 0.215483799 | 0.004011882 | 3343.545779 |
| Dpy19l1      | 0.215293575 | 0.007024346 | 1050.952136 |
| Tanc1        | 0.215020523 | 0.011465658 | 1404.126743 |
| Arhgef3      | 0.214770145 | 0.008847967 | 1121.024644 |
| Stxbp6       | 0.214480153 | 0.031846159 | 131.9315772 |

|          |             |             |             |
|----------|-------------|-------------|-------------|
| Cxyc5    | 0.213827568 | 0.003944305 | 2642.581139 |
| Adra1d   | 0.2135342   | 0.021602653 | 87.90366997 |
| Sez6l    | 0.213467393 | 0.000596252 | 12473.66088 |
| Crat     | 0.213279584 | 0.006176282 | 3553.189728 |
| Nfe2l2   | 0.213234523 | 0.043086965 | 192.2146062 |
| Pxdc1    | 0.212858268 | 0.034290667 | 447.5408571 |
| Pde7b    | 0.21249153  | 0.029741264 | 107.9833726 |
| Rhbdl3   | 0.212184967 | 0.027624449 | 751.6674476 |
| Col5a3   | 0.211472601 | 0.042688368 | 232.5818732 |
| Bend7    | 0.210992178 | 0.034313227 | 87.618403   |
| Htra4    | 0.209463065 | 0.049086524 | 1838.439788 |
| Pipox    | 0.209402906 | 0.032540305 | 76.11885023 |
| Arhgap8  | 0.209398973 | 0.047556215 | 146.8580494 |
| Klhl4    | 0.209035265 | 0.029523543 | 80.04315458 |
| Cdc42ep1 | 0.208912636 | 0.025949954 | 82.29960964 |
| Kcnh7    | 0.208419832 | 0.018133943 | 882.9529901 |
| Glul     | 0.208023413 | 0.00247166  | 5110.018987 |
| Jun      | 0.207965776 | 0.012033282 | 3836.273524 |
| Fkbp5    | 0.207618779 | 0.011308024 | 906.747481  |
| Hspb1    | 0.207575365 | 0.007649084 | 34.70605541 |
| Zfp703   | 0.207400861 | 0.037187209 | 458.8784057 |
| Flt1     | 0.207367617 | 0.044913203 | 134.6412778 |
| Camkk1   | 0.207361122 | 0.010379596 | 2329.529214 |
| Ecel1    | 0.20734445  | 0.037862123 | 449.6650931 |
| Ankrd40  | 0.207207422 | 0.002298274 | 1403.651616 |
| Brinp1   | 0.207032382 | 0.001123988 | 5898.66025  |
| Arhgef25 | 0.206972899 | 0.040348269 | 547.4271999 |
| Tgfb1i1  | 0.206115851 | 0.029742254 | 552.4967991 |
| Plxna2   | 0.205551871 | 0.00399563  | 9342.09101  |
| Scn7a    | 0.205384843 | 0.045606395 | 100.4428877 |
| Ppp3ca   | 0.204566429 | 0.000484853 | 14630.37558 |
| Syt15    | 0.204399091 | 0.014383873 | 54.28131317 |
| Lrrk2    | 0.204087188 | 0.018889739 | 767.1535982 |
| Cck      | 0.203909502 | 0.033033559 | 923.0091283 |
| Dgkg     | 0.203888524 | 0.001081459 | 5135.94966  |
| Ephb1    | 0.203805614 | 0.023241644 | 1049.808428 |
| Prex2    | 0.203641265 | 0.039409348 | 417.9008177 |
| Fam13b   | 0.203439673 | 2.04E-05    | 5470.801453 |
| Ppapdc1a | 0.202962145 | 0.035763367 | 461.8167143 |
| Fat1     | 0.202942504 | 0.005340807 | 4938.108463 |
| Cxcl12   | 0.202923231 | 0.039633774 | 497.5967031 |
| Tril     | 0.202551623 | 0.037954059 | 562.6418109 |
| Grik4    | 0.202135834 | 0.021893336 | 2091.400813 |
| Pcdh20   | 0.202073197 | 0.002727652 | 4539.619311 |
| Cdk17    | 0.201996675 | 0.001254166 | 3294.195548 |
| Maob     | 0.201825919 | 0.040726767 | 78.41049199 |
| Ppp1r10  | 0.201634232 | 0.002654227 | 3149.503683 |
| Myt1l    | 0.20126449  | 0.000597172 | 4991.368202 |
| Itga7    | 0.201071705 | 0.048104366 | 110.8404278 |
| Ptch1    | 0.201048199 | 0.018803352 | 720.6119865 |

|              |             |             |             |
|--------------|-------------|-------------|-------------|
| Kcnip3       | 0.200809134 | 0.040208581 | 485.7154441 |
| Plcb4        | 0.200403071 | 0.016502699 | 774.4810149 |
| Klhl29       | 0.200373872 | 0.025363413 | 1293.385705 |
| Large        | 0.200151576 | 0.000304426 | 6999.237826 |
| Dlgap1       | 0.19997687  | 0.001848085 | 8318.474181 |
| Ubash3b      | 0.199705129 | 0.01214277  | 990.3592214 |
| Plk2         | 0.199699925 | 0.000638165 | 6018.946788 |
| Pcdh19       | 0.199309384 | 0.049877345 | 646.2985998 |
| Btbd7        | 0.199089159 | 0.029088756 | 522.8906694 |
| Fzd1         | 0.199023236 | 0.026162555 | 1729.354059 |
| Ccng2        | 0.198827908 | 0.017047352 | 1091.997632 |
| Plxdc2       | 0.198406848 | 0.035287015 | 466.3184546 |
| Syndig1      | 0.198104003 | 0.034290667 | 647.0199192 |
| Tmem63c      | 0.197427787 | 0.002606092 | 2445.86478  |
| Wbscr17      | 0.197071515 | 0.003308239 | 2560.734795 |
| Arhgef2      | 0.196838334 | 0.003452381 | 2686.761875 |
| Mast3        | 0.196791141 | 0.002205977 | 12264.41489 |
| Flrt3        | 0.196681876 | 0.009873299 | 1368.731648 |
| Trib2        | 0.196664322 | 0.026306541 | 1133.02348  |
| Scn5a        | 0.196566406 | 0.003624003 | 25.42992404 |
| LOC100912071 | 0.195738092 | 0.034935003 | 537.8083588 |
| Grm7         | 0.195111396 | 0.006014242 | 1360.311327 |
| Rgs16        | 0.195010374 | 0.041145662 | 93.10085579 |
| Unc5d        | 0.19490417  | 0.009898909 | 1892.694417 |
| Cnr1         | 0.194786025 | 0.000446575 | 23651.22976 |
| Slc46a3      | 0.194276981 | 0.023073403 | 44.47278917 |
| Itgb4        | 0.194070037 | 0.003111068 | 26.33432449 |
| Gda          | 0.193891251 | 0.00319098  | 3191.766536 |
| Zfp219       | 0.193814967 | 0.030248836 | 879.0720074 |
| Sall2        | 0.19296917  | 0.025023323 | 1115.211028 |
| Tgfb2        | 0.192460729 | 0.033705599 | 559.4923279 |
| Egr3         | 0.1923482   | 0.025391233 | 1598.653972 |
| Opcml        | 0.19161648  | 0.00176041  | 7855.876607 |
| B3galt1      | 0.191018514 | 0.040329245 | 714.3058629 |
| Prom1        | 0.190283887 | 0.042270305 | 72.11308813 |
| Tp53i11      | 0.189991305 | 0.025363413 | 1838.39379  |
| Oprd1        | 0.189588392 | 0.024452038 | 47.71860274 |
| Kcnn1        | 0.189570972 | 0.037862123 | 1212.557476 |
| Nkiras1      | 0.188594549 | 0.011271677 | 1729.585672 |
| Cadm3        | 0.188495923 | 0.002114059 | 10339.2264  |
| Dmd          | 0.187742474 | 0.023241644 | 867.0233897 |
| Smpdl3a      | 0.187326732 | 0.042270305 | 69.28263478 |
| Nxph1        | 0.186533818 | 0.022250269 | 1335.841422 |
| Gpnmb        | 0.184867545 | 0.044856602 | 1003.202244 |
| Nfat5        | 0.184532181 | 0.005885685 | 6609.085182 |
| Pde2a        | 0.184473535 | 0.01246483  | 5735.744123 |
| Tspan17      | 0.184325986 | 0.010840334 | 2417.007351 |
| Mkks         | 0.183938263 | 0.042270305 | 930.3443069 |
| Phyhip1      | 0.183834038 | 0.000636223 | 4129.996643 |
| Ric8b        | 0.183820708 | 0.044858093 | 698.6871146 |

|          |             |             |             |
|----------|-------------|-------------|-------------|
| Ppp1r13b | 0.183669579 | 0.006049475 | 4317.196449 |
| Ppp1r12a | 0.18230688  | 0.000949199 | 4148.417977 |
| Lppr4    | 0.182034752 | 0.000649641 | 37619.57184 |
| Serpini1 | 0.181752924 | 0.000906089 | 8383.834765 |
| Arpp21   | 0.181743987 | 0.005324123 | 5447.771261 |
| Nefl     | 0.18138381  | 0.006624069 | 24634.07334 |
| Phf3     | 0.180991712 | 0.002039889 | 3257.094394 |
| Grin2a   | 0.180770054 | 0.007896892 | 3196.581332 |
| Limd2    | 0.180304958 | 0.031072611 | 1570.216421 |
| Glrx     | 0.179736315 | 0.002250206 | 3082.338307 |
| Rasal2   | 0.179225988 | 0.027842791 | 1489.137692 |
| Zfp180   | 0.179174155 | 0.025946402 | 2126.342625 |
| Ifngr2   | 0.178972164 | 0.019669638 | 1859.214783 |
| Atp1a1   | 0.17830602  | 0.000412044 | 20202.24984 |
| Frmpd4   | 0.177258203 | 0.004262633 | 2671.200901 |
| Lrp12    | 0.17691164  | 0.006316149 | 2918.30998  |
| Mmp17    | 0.176667454 | 0.047865018 | 3093.809854 |
| Arhgap21 | 0.176636239 | 0.001101077 | 21259.41148 |
| Ppp2r2c  | 0.17634854  | 0.002164604 | 6641.049318 |
| Sin3a    | 0.175414124 | 0.029890229 | 1073.79101  |
| Arhgef9  | 0.175316879 | 0.002210767 | 9567.006654 |
| Zfp609   | 0.17459988  | 0.007333994 | 3687.131223 |
| Vsnl1    | 0.174403223 | 0.002727652 | 11509.29057 |
| Hace1    | 0.174385052 | 0.008526364 | 1603.661823 |
| Palmd    | 0.174069359 | 0.016290986 | 2724.462011 |
| Fmnl1    | 0.173918219 | 0.011493885 | 2598.720338 |
| Tubgcp5  | 0.173412202 | 0.022010927 | 1022.680087 |
| Stxbp5l  | 0.172995192 | 0.013625319 | 2183.81319  |
| Gja5     | 0.17255119  | 0.041327295 | 55.51947877 |
| Spns2    | 0.172314832 | 0.021602653 | 3829.862635 |
| Pde1a    | 0.172075021 | 0.019234254 | 1567.482431 |
| Ncan     | 0.171749609 | 0.006508515 | 17894.41825 |
| Slitrk3  | 0.171263933 | 0.015996949 | 1823.260568 |
| Cyld     | 0.17109528  | 0.021365515 | 1570.852026 |
| Prkce    | 0.171017029 | 0.015361117 | 7093.218448 |
| Bcar1    | 0.170731966 | 0.020709675 | 3723.600383 |
| Xpr1     | 0.170401198 | 0.005859516 | 3825.164762 |
| Mei1     | 0.170378424 | 0.040726767 | 60.97917292 |
| Sparcl1  | 0.170177236 | 0.003022522 | 8722.212446 |
| Nr3c2    | 0.170052081 | 0.007394237 | 5589.865788 |
| Tmem132b | 0.16991025  | 0.02772625  | 1607.84761  |
| Elmod1   | 0.169310807 | 0.004044301 | 6986.140857 |
| Igfbp5   | 0.169103797 | 0.035114799 | 1248.819131 |
| Kalrn    | 0.168531586 | 0.017435184 | 9101.032242 |
| Rps6ka3  | 0.168160995 | 0.014522829 | 1766.657259 |
| Adamts4  | 0.168135179 | 0.037862123 | 43.4374774  |
| Fam20b   | 0.167999324 | 0.008132983 | 4538.108243 |
| Snx5     | 0.167652272 | 0.022250269 | 1257.391199 |
| Sec14l1  | 0.167493062 | 0.010369734 | 3699.105839 |
| Camk1d   | 0.166112618 | 0.01214277  | 3719.981465 |



|              |             |             |             |
|--------------|-------------|-------------|-------------|
| Dpp6         | 0.166016226 | 0.003599623 | 5826.479756 |
| Scn3b        | 0.165828128 | 0.012420923 | 8290.38096  |
| Wac          | 0.165322676 | 0.009837586 | 5529.195612 |
| Unc5c        | 0.165316329 | 0.014046322 | 3779.822915 |
| Zdhhc17      | 0.165236523 | 0.015209229 | 2370.449228 |
| Lrrn3        | 0.164697312 | 0.005154588 | 6209.681417 |
| LOC100125362 | 0.164511065 | 0.001228498 | 7276.520231 |
| Npepps       | 0.164410268 | 0.001397111 | 11164.46263 |
| Ncor2        | 0.164310825 | 0.013508163 | 10866.93435 |
| Reep5        | 0.164051092 | 0.000986864 | 11289.93669 |
| Pvrl3        | 0.16385566  | 0.018195184 | 1828.345409 |
| Itch         | 0.16371116  | 0.035911336 | 1219.847184 |
| Ndrgr4       | 0.162375981 | 0.002739279 | 52054.53812 |
| Kcnn2        | 0.16183055  | 0.029849073 | 1691.070618 |
| Chst1        | 0.16178798  | 0.031095491 | 6254.664317 |
| Scn1a        | 0.161606253 | 0.023919479 | 2675.449346 |
| Slc23a2      | 0.161357345 | 0.001438793 | 7591.62065  |
| St3gal5      | 0.161234761 | 0.015185122 | 5928.666231 |
| Cdh10        | 0.161052907 | 0.022671852 | 1482.756267 |
| Gria1        | 0.160646021 | 0.036713912 | 9898.444758 |
| Sirpa        | 0.160582598 | 0.002845863 | 6173.009236 |
| Ywhah        | 0.159471924 | 0.006316149 | 45207.8422  |
| St6galnac5   | 0.158970531 | 0.033099004 | 3296.094792 |
| Susd2        | 0.158189664 | 0.014514328 | 20.5196807  |
| Zhx3         | 0.158187329 | 0.012092199 | 2683.277855 |
| Lmbrd1       | 0.157492319 | 0.015842551 | 3596.219013 |
| Mphosph8     | 0.157150686 | 0.01214277  | 2673.186887 |
| Neto1        | 0.157100881 | 0.042428917 | 3509.725129 |
| Smurf2       | 0.156814481 | 0.041241662 | 1257.590067 |
| Nedd4l       | 0.156494833 | 0.00383645  | 5791.774553 |
| Pcp4         | 0.156178849 | 0.018601032 | 3896.517119 |
| Cdh9         | 0.155809969 | 0.028218263 | 2011.074371 |
| Cand1        | 0.155543214 | 0.002284859 | 8290.675361 |
| Sestd1       | 0.155102279 | 0.030623371 | 1586.639432 |
| Zfp46        | 0.15493814  | 0.027035048 | 3067.01401  |
| Tmem2        | 0.154548047 | 0.029088756 | 1765.143576 |
| Ncoa1        | 0.154532885 | 0.005023732 | 7402.14819  |
| Nap1l5       | 0.154232108 | 0.041491969 | 3095.050321 |
| Syn2         | 0.152555334 | 0.017566277 | 11095.54189 |
| Nptx1        | 0.152517754 | 0.02772625  | 18762.03088 |
| Got1         | 0.152247236 | 0.040578837 | 6117.092564 |
| Clcf1        | 0.152209681 | 0.033869211 | 32.03921787 |
| Slc35b4      | 0.152116971 | 0.02112202  | 1869.1015   |
| Kcnj6        | 0.152039444 | 0.031992794 | 6108.624105 |
| Atp2b3       | 0.151373754 | 0.024912427 | 5142.248565 |
| Klhl23       | 0.150696278 | 0.046105027 | 2838.89446  |
| Mpdz         | 0.149897445 | 0.011675501 | 3191.042165 |
| Ccny         | 0.149744151 | 0.035114799 | 1726.19131  |
| Sv2b         | 0.149653855 | 0.012332451 | 10276.83789 |
| Ccl7         | 0.149634616 | 0.037605674 | 30.88633027 |

|           |             |             |             |
|-----------|-------------|-------------|-------------|
| Slitrk5   | 0.149192202 | 0.02137586  | 4801.014012 |
| Abi2      | 0.14903303  | 0.021698976 | 10337.63913 |
| Cyth3     | 0.148427169 | 0.018133943 | 2623.793473 |
| Tubb4a    | 0.147869646 | 0.013644093 | 16180.3912  |
| Zfp148    | 0.147533233 | 0.010793125 | 3616.431404 |
| Sept5     | 0.147200444 | 0.016950655 | 17982.00783 |
| Ptprj     | 0.147191177 | 0.028288746 | 4939.29719  |
| LOC690806 | 0.145316836 | 0.00758592  | 5814.366869 |
| Cadps     | 0.145038997 | 0.001773769 | 8081.043592 |
| Scd2      | 0.144823697 | 0.005168369 | 72157.63094 |
| Phf20l1   | 0.144756611 | 0.048147333 | 3049.802719 |
| Map7d2    | 0.144738859 | 0.018133943 | 3545.458918 |
| Mapk1     | 0.144273172 | 0.006203705 | 24908.91226 |
| Fbxo11    | 0.144231544 | 0.01392468  | 5728.606518 |
| Pak7      | 0.144141955 | 0.021235449 | 2411.510431 |
| Atp1a3    | 0.143830701 | 0.012468676 | 75670.52699 |
| Dnajb5    | 0.143755809 | 0.038167239 | 4905.052275 |
| Tubb4b    | 0.142843119 | 0.038096971 | 13515.49443 |
| Aftph     | 0.14281666  | 0.013162296 | 3333.101897 |
| Ash1l     | 0.142567045 | 0.04288404  | 8109.452734 |
| Kif2a     | 0.142244471 | 0.014478844 | 6991.154904 |
| Tuba1b    | 0.141671943 | 0.019242479 | 13689.01971 |
| Bsn       | 0.141397359 | 0.043654663 | 37634.2831  |
| Ndufs1    | 0.141361782 | 0.02019948  | 4948.072436 |
| Atrn      | 0.14133514  | 0.00383645  | 15772.10852 |
| Dgkb      | 0.141065741 | 0.022209948 | 6308.846237 |
| Kcnq2     | 0.141001041 | 0.02137586  | 7110.704774 |
| Atp2c1    | 0.140563912 | 0.003280014 | 10098.04636 |
| Dhx9      | 0.139221885 | 0.018031318 | 7126.566752 |
| Elavl2    | 0.138915129 | 0.031324911 | 3595.840567 |
| Map1a     | 0.136236133 | 0.022019662 | 39011.81027 |
| Camsap2   | 0.136197095 | 0.026658114 | 13106.17711 |
| Herc3     | 0.135814344 | 0.021887017 | 4903.782068 |
| Pea15     | 0.135596955 | 0.019234254 | 14072.13545 |
| Gabbr2    | 0.135460128 | 0.032402234 | 14292.98736 |
| Dennd5a   | 0.135141637 | 0.014816594 | 8520.993386 |
| Lrfn5     | 0.134498081 | 0.04700916  | 3741.997066 |
| Jak1      | 0.134014128 | 0.003916355 | 8196.64872  |
| Dkk3      | 0.133869498 | 0.04455868  | 4735.708471 |
| Rev1      | 0.133794599 | 0.037234085 | 2556.847918 |
| Rgs7      | 0.133502817 | 0.035555212 | 3728.871427 |
| Smc5      | 0.133422446 | 0.047572876 | 2450.758329 |
| Thrsp     | 0.133414894 | 0.036445519 | 25.67353828 |
| Hectd2    | 0.133134742 | 0.035911336 | 5397.555528 |
| Socs5     | 0.132760663 | 0.045209413 | 3700.131968 |
| Slmap     | 0.132545755 | 0.027603195 | 3301.327518 |
| Pak1      | 0.132539731 | 0.03948995  | 6099.531246 |
| Prnp      | 0.132408181 | 0.045575544 | 17020.45414 |
| Gabbr3    | 0.131744427 | 0.019521902 | 8594.68514  |
| Casc4     | 0.13149453  | 0.020647018 | 7896.475483 |

|          |              |             |             |
|----------|--------------|-------------|-------------|
| Stx1b    | 0.131166274  | 0.023831067 | 7580.138954 |
| Syn1     | 0.131119961  | 0.005782698 | 31031.66261 |
| Setd5    | 0.131022281  | 0.017092281 | 9729.200046 |
| Idh3a    | 0.130537278  | 0.02994488  | 9650.632023 |
| Syt11    | 0.130411679  | 0.009946094 | 19037.80031 |
| Ei24     | 0.130041769  | 0.036156324 | 3943.478981 |
| Matr3    | 0.129956455  | 0.01957617  | 21801.02353 |
| Cnksr2   | 0.129093677  | 0.019314735 | 6369.906766 |
| Frs2     | 0.128845277  | 0.03806875  | 3821.230751 |
| Mgat3    | 0.128670755  | 0.043383214 | 5755.085099 |
| Ctnnb1   | 0.128392582  | 0.01797505  | 13404.37922 |
| Itm2b    | 0.128145055  | 0.01356512  | 7888.291429 |
| Cul4a    | 0.127992232  | 0.039409348 | 2785.769099 |
| Pds5b    | 0.127903237  | 0.031269117 | 5383.544185 |
| Hspa4l   | 0.12742128   | 0.039633774 | 4551.109153 |
| Disp2    | 0.126961916  | 0.015701317 | 18229.73253 |
| Nptn     | 0.126668573  | 0.008704452 | 17024.39607 |
| Fgf13    | 0.12649576   | 0.032300228 | 14202.0198  |
| Slc35f1  | 0.12605776   | 0.021602653 | 6092.887361 |
| Csnk1g3  | 0.12347723   | 0.041772069 | 3827.511176 |
| Calm2    | 0.123081514  | 0.016084735 | 19751.91629 |
| Megf9    | 0.122873112  | 0.033674164 | 5625.783733 |
| Napb     | 0.122792613  | 0.01964324  | 6095.30211  |
| Lpin2    | 0.122097639  | 0.040329245 | 4181.694533 |
| Rab6b    | 0.122050331  | 0.006755664 | 54015.50188 |
| Sptan1   | 0.121681262  | 0.038167239 | 80438.5209  |
| Serinc1  | 0.121030438  | 0.032725243 | 36135.57062 |
| Fam8a1   | 0.12066188   | 0.022250269 | 4526.018802 |
| Slc24a3  | 0.120213009  | 0.038774728 | 6462.457596 |
| Olfm1    | 0.11943659   | 0.019649185 | 26959.08304 |
| Capza2   | 0.118974852  | 0.04675949  | 7332.697098 |
| Sdcbp    | 0.118858139  | 0.04525858  | 12678.77421 |
| Ddx5     | 0.115864135  | 0.031773849 | 22328.56497 |
| Dnaja1   | 0.115783935  | 0.036140518 | 12200.94681 |
| Arhgap35 | 0.115225719  | 0.007896892 | 20978.23073 |
| Pja2     | 0.114919164  | 0.01280438  | 28686.84619 |
| Gtf2i    | 0.113888802  | 0.031451136 | 8194.665861 |
| Nell2    | 0.112864452  | 0.024867804 | 39312.96066 |
| Cyfip2   | 0.111822693  | 0.021705245 | 24395.62578 |
| Rapgef2  | 0.111517165  | 0.042690403 | 8285.58566  |
| Synj1    | 0.110547753  | 0.034407116 | 16551.97847 |
| Nsf      | 0.107411682  | 0.03960839  | 23511.06626 |
| Btbd1    | 0.106303222  | 0.049666127 | 6162.626874 |
| Epb41l1  | 0.105470418  | 0.037593247 | 20662.86823 |
| Rtn4     | 0.096876025  | 0.037187209 | 31115.08662 |
| Nfix     | -0.110563022 | 0.049667608 | 12417.95849 |
| Acat1    | -0.116744033 | 0.027711072 | 6576.780296 |
| Insig1   | -0.117682311 | 0.018107757 | 15899.26348 |
| Srsf2    | -0.118181324 | 0.046487251 | 5383.602643 |
| Wdr6     | -0.118737067 | 0.006509217 | 19708.29178 |

|           |              |             |             |
|-----------|--------------|-------------|-------------|
| Iqsec3    | -0.119565899 | 0.006743086 | 19135.97203 |
| MGC109340 | -0.119807305 | 0.039696721 | 9315.239623 |
| Mllt1     | -0.120726559 | 0.029394332 | 5573.720608 |
| Dync1i1   | -0.122315747 | 0.031961947 | 8981.384964 |
| Dcaf11    | -0.123742004 | 0.026306541 | 3948.176401 |
| Ldha      | -0.128147186 | 0.006392933 | 24191.84997 |
| Ftl1      | -0.129193544 | 0.020433217 | 16191.05288 |
| Dgkq      | -0.129452787 | 0.037862123 | 2770.198157 |
| Mtss1l    | -0.129614967 | 0.008941635 | 11049.97032 |
| Cyp51     | -0.129855477 | 0.019100745 | 21070.54808 |
| Rps14     | -0.129980798 | 0.036265139 | 2893.116292 |
| Cyb5r3    | -0.131390394 | 0.019899477 | 5739.67355  |
| Ppp1r11   | -0.131545442 | 0.044481836 | 3230.280045 |
| Narf      | -0.132044219 | 0.047604542 | 4632.204724 |
| Caly      | -0.132317573 | 0.022173727 | 9000.852266 |
| Tspyl2    | -0.13274872  | 0.017175598 | 4577.382181 |
| Dhcr24    | -0.133444682 | 0.020916955 | 7474.753961 |
| Aacs      | -0.134128464 | 0.016386327 | 5434.349509 |
| Gpsm1     | -0.134699014 | 0.018747476 | 4438.014035 |
| Itpa      | -0.134843476 | 0.029820132 | 2523.283255 |
| Psd       | -0.135056387 | 0.038167239 | 12479.70467 |
| Samd4b    | -0.135206931 | 0.031269117 | 5545.716765 |
| Rpl13     | -0.135499689 | 0.016741606 | 4879.646375 |
| Fcho1     | -0.135608792 | 0.024512513 | 4564.496024 |
| Sema4f    | -0.136554183 | 0.038681754 | 2629.643238 |
| Fbxo33    | -0.13677771  | 0.042428917 | 2821.212711 |
| Ttl       | -0.136997779 | 0.040726767 | 2543.719212 |
| Tmem35    | -0.13727865  | 0.012843999 | 19037.71954 |
| Def8      | -0.13729956  | 0.049667608 | 1675.865592 |
| Ldb1      | -0.138387866 | 0.027715469 | 2498.595066 |
| Ncln      | -0.140750018 | 0.031666327 | 4251.966458 |
| Szrd1     | -0.141389878 | 0.030623371 | 1835.984844 |
| Lrrc73    | -0.141464936 | 0.042270305 | 3129.362923 |
| Fv1       | -0.141495507 | 0.014103773 | 3571.516195 |
| Flrt1     | -0.14155098  | 0.038087835 | 2167.928251 |
| Rnf40     | -0.141686328 | 0.024005584 | 2766.474983 |
| LOC689986 | -0.141814962 | 0.028223812 | 4236.781548 |
| Os9       | -0.14245177  | 0.009963459 | 4532.618141 |
| Tmem132a  | -0.142788732 | 0.025863017 | 28212.87976 |
| Sipa1l2   | -0.143846684 | 0.034825167 | 3559.849951 |
| Nck2      | -0.144308673 | 0.033674164 | 3041.989438 |
| Cnrip1    | -0.145004719 | 0.006010507 | 7367.655376 |
| Zdhhc9    | -0.145348994 | 0.045606395 | 2788.149594 |
| Syt4      | -0.146149238 | 0.012092199 | 17234.58824 |
| Tra2b     | -0.146436558 | 0.032738786 | 3900.987227 |
| Hmg1l1    | -0.146769006 | 0.044193656 | 1461.090655 |
| Kcnf1     | -0.146777804 | 0.040701569 | 1710.226751 |
| Rhot2     | -0.146859083 | 0.032155476 | 2841.279938 |
| Pgm2      | -0.147788699 | 0.035577319 | 2361.147748 |
| Ddx41     | -0.148014332 | 0.023453498 | 2098.00195  |

|              |              |             |             |
|--------------|--------------|-------------|-------------|
| Slc3a2       | -0.148174612 | 0.026920975 | 6530.006198 |
| Smpd3        | -0.148302547 | 0.002727652 | 8063.141022 |
| Dnajb11      | -0.149025576 | 0.013302279 | 2663.94204  |
| Lrfn4        | -0.149363197 | 0.037862123 | 4110.209538 |
| Smyd2        | -0.150283156 | 0.022780372 | 1985.916693 |
| Katnb1       | -0.150337847 | 0.02371892  | 1872.599793 |
| Dcaf15       | -0.150717524 | 0.033191583 | 1427.968526 |
| Map3k9       | -0.151786467 | 0.037674776 | 3682.188126 |
| Mrps25       | -0.15190369  | 0.045416803 | 1221.428392 |
| Gorasp1      | -0.153088008 | 0.031862741 | 1875.14548  |
| Asns         | -0.153462747 | 0.047504241 | 5055.362713 |
| Lrrc16b      | -0.154052609 | 0.012302923 | 7501.06349  |
| Mib2         | -0.154438709 | 0.00622509  | 5609.629034 |
| Mvk          | -0.154663112 | 0.036713912 | 1203.638273 |
| Aco1         | -0.154739405 | 0.035137188 | 2667.746485 |
| RGD735029    | -0.15527484  | 0.040726767 | 2124.202208 |
| Abhd17a      | -0.155286304 | 0.030623371 | 3344.219344 |
| Capn10       | -0.155602768 | 0.020711458 | 1640.832638 |
| Enthd2       | -0.156602163 | 0.017435184 | 1965.464151 |
| Slc2a8       | -0.157364769 | 0.03840161  | 1529.949015 |
| Preb         | -0.157657038 | 0.014278703 | 1822.659719 |
| Hs6st3       | -0.158448318 | 0.026306541 | 1708.08383  |
| Atp13a2      | -0.158618493 | 0.003842614 | 17516.51094 |
| Xpo1         | -0.158772985 | 0.026308346 | 7434.82039  |
| Emc10        | -0.159631174 | 0.032300228 | 3502.695272 |
| Vps18        | -0.160050672 | 0.02379866  | 1451.608769 |
| Hyou1        | -0.160654579 | 0.018133943 | 10132.17874 |
| Yars         | -0.161214915 | 0.005757119 | 6972.529571 |
| Rab4b        | -0.161241543 | 0.024135793 | 2204.927044 |
| Marcks1      | -0.161503485 | 0.019653023 | 3199.620277 |
| Marcks       | -0.162186523 | 0.001627248 | 6429.846404 |
| Dhcr7        | -0.162351599 | 0.002606092 | 5849.399591 |
| Fam127b      | -0.16246688  | 0.026529191 | 1968.310832 |
| Rdh11        | -0.163100651 | 0.029549898 | 1781.020994 |
| Sidt1        | -0.164258394 | 0.024154142 | 1585.233265 |
| Eif2ak4      | -0.164623341 | 0.044356284 | 1694.8647   |
| Sfxn3        | -0.165139586 | 0.003842614 | 6889.065994 |
| LOC100151767 | -0.166708181 | 0.029803431 | 1757.633326 |
| Fgfr1        | -0.167099153 | 0.000760744 | 18768.99173 |
| Nucb2        | -0.168332751 | 0.045017366 | 1575.931155 |
| Lss          | -0.168729147 | 0.049093894 | 7529.080521 |
| Trappc9      | -0.169252006 | 0.015724316 | 1813.52055  |
| Fbxw4        | -0.170083322 | 0.026264615 | 1112.575656 |
| Manf         | -0.170544042 | 0.037234085 | 1314.623272 |
| Usp2         | -0.171389674 | 0.023228425 | 1488.915097 |
| Ift20        | -0.17178581  | 0.024912427 | 1231.5298   |
| Man2c1       | -0.17241233  | 0.00562203  | 2709.178706 |
| Zfp428       | -0.172547593 | 0.039633774 | 1413.703096 |
| Efnb3        | -0.173152926 | 0.015323464 | 15159.03545 |
| Ddt          | -0.173344954 | 0.022422785 | 1440.282431 |

|            |              |             |             |
|------------|--------------|-------------|-------------|
| Prr5       | -0.173395804 | 0.026306541 | 1299.249269 |
| Sertm1     | -0.17346466  | 0.046494305 | 2196.952349 |
| Cxadr      | -0.17376222  | 0.025150071 | 4772.415751 |
| Masp1      | -0.174291955 | 0.028288746 | 3178.963637 |
| Qdpr       | -0.174391926 | 0.003624003 | 2216.483717 |
| Arsb       | -0.174828367 | 0.032738786 | 1229.041036 |
| Adck4      | -0.174906286 | 0.03960839  | 1044.431499 |
| Lmf2       | -0.175001035 | 0.045388233 | 1047.440315 |
| Zfp414     | -0.175237127 | 0.038365243 | 761.2898953 |
| Elavl4     | -0.175415905 | 0.005951774 | 2164.659295 |
| Bbs1       | -0.175747889 | 0.00290569  | 2160.645612 |
| Rara       | -0.175823164 | 0.011154981 | 1326.70723  |
| Xrcc1      | -0.175968159 | 0.017092281 | 2113.517015 |
| Sarm1      | -0.176712761 | 0.007394237 | 2657.668518 |
| Pkia       | -0.17693401  | 0.003308239 | 9096.909111 |
| Vash2      | -0.177021605 | 0.035555212 | 1207.896764 |
| Tmem109    | -0.177471676 | 0.040208581 | 675.8083568 |
| RGD1306954 | -0.177497424 | 0.03207304  | 859.4668455 |
| Tbc1d8     | -0.177751547 | 0.037187209 | 982.601992  |
| Cdk5rap3   | -0.178223681 | 0.032738786 | 813.5923906 |
| Banf1      | -0.178374133 | 0.025019082 | 1367.482056 |
| Dkc1       | -0.178593481 | 0.014103773 | 1645.450232 |
| Mif        | -0.178903971 | 0.003758213 | 4979.434483 |
| Rnpepl1    | -0.178992833 | 0.048767319 | 625.4348509 |
| Fdps       | -0.179265535 | 0.001357429 | 13788.94263 |
| Rps6ka1    | -0.17972412  | 0.028611105 | 903.0448345 |
| Stk11ip    | -0.180373513 | 0.005885685 | 1828.83039  |
| Slc2a2     | -0.180544047 | 0.034106693 | 71.81343849 |
| Dnaaf5     | -0.181551846 | 0.042431638 | 572.4544476 |
| Rnf7       | -0.181709512 | 0.037234085 | 750.0450928 |
| Oat        | -0.18198256  | 0.002222624 | 3732.455834 |
| Hmga1      | -0.18241833  | 0.026264615 | 1080.050174 |
| Nup210     | -0.182519387 | 0.025950057 | 2362.293218 |
| Pxmp4      | -0.183335937 | 0.015842551 | 1125.207257 |
| Rreb1      | -0.183336497 | 0.004709091 | 3635.679917 |
| Hcn4       | -0.183611425 | 0.043159345 | 814.9062958 |
| Rps20      | -0.183685507 | 0.001848085 | 2513.509501 |
| Smyd5      | -0.183843083 | 0.037439787 | 888.1685471 |
| Cbx8       | -0.183855493 | 0.044532437 | 577.8789403 |
| Meaf6      | -0.18390788  | 0.026306541 | 1157.855806 |
| Pcsk5      | -0.184702147 | 0.011742118 | 2109.663882 |
| Nphp1      | -0.184923574 | 0.020644183 | 963.0077048 |
| Actr3b     | -0.185012518 | 0.014383873 | 3114.950149 |
| Elmo1      | -0.185671243 | 0.010842481 | 2369.676789 |
| Spcs3      | -0.18604399  | 0.011200977 | 1405.410754 |
| Sec61a1    | -0.186148429 | 0.011465658 | 7083.855188 |
| Xkr6       | -0.186183515 | 0.042428917 | 608.9081495 |
| Pdpf       | -0.186205449 | 0.007818611 | 2155.412642 |
| L3mbtl2    | -0.186570357 | 0.007073671 | 1969.649582 |
| Slc7a5     | -0.186593926 | 0.025746505 | 8217.350273 |

|            |              |             |             |
|------------|--------------|-------------|-------------|
| Chkb       | -0.186971991 | 0.002727652 | 1817.474677 |
| Lmna       | -0.187169179 | 0.002727652 | 3338.493224 |
| Camk1g     | -0.188495271 | 0.00114407  | 3523.295723 |
| Carkd      | -0.188558028 | 0.019683669 | 914.8501498 |
| Msto1      | -0.188999115 | 0.025863017 | 780.9844621 |
| Cdh13      | -0.18919545  | 0.000546315 | 10349.52773 |
| Acot3      | -0.189660228 | 0.046813713 | 482.8290788 |
| Asic2      | -0.189741601 | 0.008952814 | 3717.98889  |
| Akap17a    | -0.189821973 | 0.00169723  | 1914.144057 |
| Dusp4      | -0.189923026 | 0.001311582 | 5145.952515 |
| Sdr39u1    | -0.190173808 | 0.006377434 | 1327.630156 |
| Gpr19      | -0.190505616 | 0.041441588 | 554.6865046 |
| Ntng2      | -0.190723439 | 0.001119195 | 6328.864021 |
| Usp36      | -0.190782263 | 0.018107757 | 2351.076513 |
| Ier2       | -0.190807458 | 0.020647018 | 967.5433943 |
| Sorcs2     | -0.190826722 | 0.000790766 | 14296.15996 |
| Fam214b    | -0.19142512  | 0.010376237 | 1169.113428 |
| RGD1562310 | -0.191442033 | 0.046006438 | 1225.592495 |
| Ablim3     | -0.191446632 | 0.022602741 | 2357.211263 |
| Rbm3       | -0.191697897 | 0.000324575 | 6470.632477 |
| Gpd1l      | -0.19171841  | 0.00758592  | 1474.085964 |
| Emx2       | -0.191864009 | 0.016898182 | 900.306781  |
| Tchp       | -0.191988346 | 0.033722222 | 560.2892048 |
| Foxp4      | -0.192964407 | 0.031269117 | 604.7074637 |
| Tle2       | -0.192979711 | 0.009873299 | 1110.354615 |
| Acat2      | -0.192992587 | 0.001415587 | 5094.636155 |
| Cstf2      | -0.193014508 | 0.003973489 | 9476.421144 |
| Commd4     | -0.193063257 | 0.003888324 | 1336.433484 |
| Trim67     | -0.193805341 | 0.028765717 | 982.1116548 |
| Col7a1     | -0.194325096 | 0.038096971 | 61.33143049 |
| Rasl11b    | -0.194580878 | 0.017955801 | 3246.260482 |
| Ccdc64     | -0.195362617 | 0.001416265 | 2755.826652 |
| Mob3a      | -0.195741344 | 0.01214277  | 1058.782488 |
| Ubxn8      | -0.195857384 | 0.048767319 | 392.8390031 |
| Mmp24      | -0.195907551 | 0.002548495 | 7653.764753 |
| Sec24d     | -0.196396511 | 0.014274816 | 1925.116426 |
| Inpp4b     | -0.196581685 | 0.049890964 | 558.9146342 |
| Frmd6      | -0.196704067 | 0.044728247 | 532.6994759 |
| Stk40      | -0.197009471 | 0.001597734 | 2492.451556 |
| Pafah1b3   | -0.197226426 | 0.030427729 | 741.1107438 |
| Kiaa0895l  | -0.197548281 | 0.000280169 | 4387.311518 |
| Itfg2      | -0.198281463 | 0.038313379 | 393.4827854 |
| Chst11     | -0.198589444 | 0.005306701 | 1129.208721 |
| Mrpl54     | -0.198834226 | 0.026572065 | 542.2630052 |
| Ccnd3      | -0.198872547 | 0.006001738 | 1303.342845 |
| Brd9       | -0.199106476 | 0.003984275 | 3685.02162  |
| Osbpl7     | -0.199188074 | 0.012749658 | 992.3139921 |
| Mafk       | -0.199703005 | 0.018133943 | 668.9037489 |
| Tmem184b   | -0.199793309 | 0.002039889 | 3333.171727 |
| Ptp4a3     | -0.200014893 | 0.006975891 | 1158.062511 |

|              |              |             |             |
|--------------|--------------|-------------|-------------|
| Adck5        | -0.200143225 | 0.017566277 | 713.7550481 |
| Sept6        | -0.200685043 | 0.001941944 | 2858.374807 |
| Ogfod2       | -0.200965285 | 0.041572563 | 406.6506856 |
| Ppp2r3b      | -0.201261101 | 0.020625384 | 581.2433248 |
| Pak6         | -0.201330501 | 1.46E-05    | 10202.93101 |
| Midn         | -0.201514661 | 0.002436608 | 3127.762647 |
| Lrrc20       | -0.201655255 | 0.040726767 | 351.639929  |
| Uck1         | -0.202156185 | 0.003074395 | 1431.892414 |
| Ntsr1        | -0.20241224  | 0.037187209 | 432.3545427 |
| RGD1311946   | -0.203460308 | 0.003714202 | 1601.531235 |
| Ddah2        | -0.204321278 | 0.015695664 | 865.1468937 |
| Aldh2        | -0.205016034 | 0.013719224 | 697.9749779 |
| Adamts15     | -0.205036063 | 0.02994488  | 504.6807148 |
| Slc16a13     | -0.206260763 | 0.039724849 | 312.2795162 |
| Arnt         | -0.206385663 | 0.016898182 | 854.8029212 |
| Hdac5        | -0.206495942 | 7.85E-06    | 7890.490885 |
| RGD1564149   | -0.206643008 | 0.010379596 | 41.69968992 |
| Nr4a2        | -0.206652833 | 0.016502699 | 4286.891831 |
| Rell2        | -0.207804727 | 0.000204269 | 3273.094129 |
| Rgs9         | -0.208046723 | 0.043578428 | 398.5167937 |
| Alkbh7       | -0.208110218 | 0.03960042  | 377.2968187 |
| Per1         | -0.208135742 | 6.80E-05    | 5236.680247 |
| Mcm5         | -0.208157511 | 0.028969763 | 70.52304839 |
| LOC100911483 | -0.208244633 | 0.001899058 | 1454.165552 |
| Stac2        | -0.20842067  | 0.013625319 | 969.6880509 |
| Hexdc        | -0.20864382  | 0.007698632 | 1289.061061 |
| Mrpl23       | -0.209867007 | 0.031181184 | 426.1640242 |
| Cirbp        | -0.210122643 | 0.00273804  | 2532.117226 |
| Hmgn2        | -0.21024844  | 0.013162296 | 3643.579564 |
| Tenm3        | -0.210519343 | 0.013760079 | 4314.183822 |
| Tmem242      | -0.210847219 | 0.014383873 | 620.1027215 |
| Eln          | -0.210963292 | 0.041640941 | 196.3027036 |
| Lef1         | -0.211240935 | 0.033475251 | 467.717839  |
| Dnaaf2       | -0.211464943 | 0.012843999 | 835.1668403 |
| Eml2         | -0.211670618 | 0.000264131 | 5262.66834  |
| Lime1        | -0.212437431 | 0.019242479 | 936.6177593 |
| Tfr2         | -0.212977499 | 0.043706542 | 241.0457746 |
| Npas2        | -0.213427915 | 0.002369065 | 1365.459463 |
| Sczep1       | -0.213784958 | 0.002120398 | 1300.474667 |
| Hcn3         | -0.215047918 | 0.002250206 | 2165.473934 |
| Hes6         | -0.21518026  | 0.000534567 | 2547.846058 |
| Gpr88        | -0.215358743 | 0.021594925 | 570.9437371 |
| Sema3a       | -0.215479311 | 0.037234085 | 302.2500113 |
| Klhdc8b      | -0.215814437 | 0.002336462 | 1796.740672 |
| Gle1         | -0.216159584 | 0.010457903 | 658.0566415 |
| Pla2g4b      | -0.216630195 | 0.024452038 | 602.1985367 |
| Angel1       | -0.217001165 | 0.018133943 | 809.3068029 |
| Dusp1        | -0.217110032 | 0.038337659 | 2269.677968 |
| Slc6a11      | -0.217795648 | 0.008633047 | 2041.187543 |
| Hadh         | -0.21892057  | 0.025863017 | 393.3813968 |



|            |              |             |             |
|------------|--------------|-------------|-------------|
| Cdc14b     | -0.21948727  | 0.036142433 | 183.7453137 |
| B3gnt7     | -0.219533633 | 0.029088756 | 105.4845423 |
| Ick        | -0.219963578 | 0.002444179 | 1825.237897 |
| Srrd       | -0.220195336 | 0.014715631 | 500.1472424 |
| Csrnp1     | -0.220349571 | 0.005808726 | 1171.458682 |
| Kif13a     | -0.22050031  | 0.003360514 | 2559.332476 |
| Crh        | -0.220699308 | 0.005101587 | 63.38862689 |
| Snapc1     | -0.22073983  | 0.025863017 | 349.7787989 |
| Rpp21      | -0.221530606 | 0.021602653 | 399.402146  |
| Stac3      | -0.222471074 | 0.012617795 | 91.56365627 |
| Zdhhc4     | -0.223404392 | 0.011772009 | 492.071969  |
| Psat1      | -0.224856256 | 0.006001738 | 1492.997303 |
| Rfx5       | -0.224981958 | 0.006898375 | 1475.334403 |
| Padi2      | -0.225275392 | 0.026658114 | 312.5155573 |
| Rasd2      | -0.225309139 | 0.000398728 | 4864.19585  |
| Sfxn4      | -0.225317229 | 0.024912427 | 396.4758787 |
| Trim66     | -0.22545421  | 0.012092199 | 640.9720931 |
| Il6r       | -0.226822988 | 0.000790766 | 1570.922549 |
| RGD1308134 | -0.227173882 | 0.012501191 | 567.7421525 |
| Atf5       | -0.227740385 | 0.007986809 | 1757.395429 |
| Ppp2r3a    | -0.22813542  | 0.010760035 | 1661.291414 |
| Acaa1a     | -0.22918768  | 0.004779033 | 1079.709976 |
| Sesn2      | -0.229948086 | 0.00399563  | 4221.887056 |
| St3gal1    | -0.230232838 | 0.017435184 | 474.6394108 |
| Fhod3      | -0.230363301 | 0.007279112 | 1335.001511 |
| Pde8b      | -0.230667289 | 0.011675501 | 445.1923249 |
| Vegfa      | -0.230742871 | 0.001476652 | 6997.175487 |
| Qsox1      | -0.23153802  | 0.001360801 | 1293.292907 |
| Rapgef3    | -0.231666466 | 0.021172303 | 365.3229607 |
| Gys1       | -0.232488109 | 0.00273804  | 1231.376247 |
| Lgi2       | -0.232580172 | 0.020647018 | 4443.071685 |
| Pcdh8      | -0.233137962 | 1.19E-05    | 14576.58915 |
| Ece1       | -0.233172997 | 0.002438336 | 1948.004032 |
| Calb2      | -0.233665068 | 0.018485231 | 595.8373326 |
| Slc7a8     | -0.233862852 | 7.19E-05    | 4785.489966 |
| Eefsec     | -0.234455947 | 0.009367764 | 441.015876  |
| Sult2b1    | -0.234504918 | 0.010672682 | 507.5982948 |
| Rtkn2      | -0.234878551 | 0.021235449 | 144.557764  |
| Fam213a    | -0.235111206 | 0.000171169 | 2243.509627 |
| Cep89      | -0.235477505 | 0.00268119  | 924.7888818 |
| Slc17a6    | -0.237727125 | 0.00516921  | 1689.182537 |
| Tmem151b   | -0.238730109 | 3.48E-05    | 2986.424127 |
| Hsd17b10   | -0.238738188 | 0.002816022 | 638.9931662 |
| Leng1      | -0.238964206 | 0.013625319 | 349.3941106 |
| Slc26a6    | -0.239820082 | 0.002548495 | 728.490878  |
| Arhgdib    | -0.240334662 | 0.018682314 | 188.6029068 |
| Cflar      | -0.240573302 | 0.004262633 | 694.5461305 |
| Cars2      | -0.240616264 | 0.008078978 | 492.6759878 |
| Acta2      | -0.242483346 | 0.014103773 | 169.7679179 |
| Chodl      | -0.242647057 | 0.00987797  | 103.0262314 |

|            |              |             |             |
|------------|--------------|-------------|-------------|
| Mylk       | -0.242873597 | 0.011321492 | 551.3400964 |
| Plxnd1     | -0.244491546 | 0.000191433 | 3272.018751 |
| Gcat       | -0.244701705 | 0.007377942 | 526.5657014 |
| Pycr1      | -0.247456299 | 0.011193098 | 451.5366342 |
| Wfs1       | -0.24786643  | 0.003360514 | 2152.930051 |
| Adamts18   | -0.248265035 | 0.006203705 | 971.6864208 |
| Grem2      | -0.248428885 | 0.002727652 | 688.9773725 |
| Tox        | -0.248558968 | 0.01398471  | 340.6966842 |
| RGD1563348 | -0.249861369 | 0.001623728 | 954.6037603 |
| Podxl2     | -0.249898917 | 8.29E-06    | 6356.98046  |
| Grip2      | -0.249966453 | 0.006602808 | 619.3459787 |
| Pdxk       | -0.250034694 | 0.000586251 | 1099.550566 |
| Fam107b    | -0.250924998 | 0.00383645  | 872.8770074 |
| Nfil3      | -0.250928971 | 0.001750898 | 3625.938557 |
| Hsd17b7    | -0.251171224 | 0.002548495 | 1564.642416 |
| Kcnk3      | -0.251178643 | 0.006439344 | 355.1881694 |
| Ndrgr1     | -0.252085791 | 0.004044993 | 1088.076688 |
| Arid5a     | -0.25271094  | 0.002727652 | 843.6318161 |
| Sdf2l1     | -0.252784653 | 0.01214277  | 160.5646015 |
| Triobp     | -0.25278735  | 0.004240407 | 731.6101023 |
| Myof       | -0.253355827 | 0.003963291 | 1520.351461 |
| Gpc2       | -0.254500677 | 0.011321492 | 174.7472328 |
| Ppp1r15a   | -0.254944185 | 7.45E-05    | 2374.156559 |
| Galt       | -0.254962875 | 0.011313193 | 187.5153716 |
| Ankrd44    | -0.255530485 | 0.004069515 | 1057.313878 |
| Gm2a       | -0.255563091 | 0.000654731 | 1174.398623 |
| Slc25a1    | -0.255730725 | 0.00010236  | 3317.484611 |
| RGD1312005 | -0.256956633 | 0.001554886 | 1238.236306 |
| Dcn        | -0.25750334  | 0.005410668 | 815.234834  |
| Npr3       | -0.260402667 | 0.00758592  | 177.1883866 |
| Bace2      | -0.260741737 | 0.002598327 | 756.6836332 |
| Nkd2       | -0.26170455  | 0.006267496 | 346.3941424 |
| Gch1       | -0.262014988 | 0.005324123 | 145.4957673 |
| Sapcd2     | -0.262145182 | 0.008456706 | 179.0622427 |
| Popdc3     | -0.26311401  | 0.007024346 | 245.0036204 |
| Stat5b     | -0.265871998 | 0.000939987 | 768.6051844 |
| Mvd        | -0.265936188 | 1.30E-05    | 5554.860037 |
| Trib1      | -0.266438043 | 0.001239883 | 857.8521998 |
| Crem       | -0.26659047  | 0.001005537 | 793.3791445 |
| Plagl1     | -0.268429399 | 0.002548495 | 1730.429979 |
| LOC691153  | -0.268739961 | 0.003848642 | 703.2379643 |
| Fam213b    | -0.271959226 | 0.003624003 | 377.1517883 |
| Lpin3      | -0.273511997 | 0.005008161 | 237.4688015 |
| Wdr63      | -0.274855668 | 0.005138474 | 217.9736708 |
| Prrt4      | -0.27524002  | 0.001077181 | 651.7773875 |
| Pycr2      | -0.275588611 | 0.000786668 | 546.0111107 |
| Fam184b    | -0.276435039 | 0.000243136 | 1179.414226 |
| Anks6      | -0.278063421 | 0.001139593 | 572.8278015 |
| Chst8      | -0.27868095  | 0.001140101 | 663.5881162 |
| Fxyd6      | -0.279320956 | 0.000406397 | 3037.299641 |

|            |              |             |             |
|------------|--------------|-------------|-------------|
| Fyb        | -0.279588764 | 0.002731893 | 129.9391462 |
| Xylb       | -0.279917774 | 0.000966156 | 1628.708914 |
| Dusp5      | -0.28063319  | 1.86E-05    | 1565.328605 |
| Yif1a      | -0.280973665 | 0.00273804  | 281.279439  |
| Kif26a     | -0.281079133 | 0.00273804  | 355.8959631 |
| Fam163b    | -0.28368748  | 0.000279846 | 1471.427817 |
| Rbm11      | -0.285839081 | 0.000846465 | 537.3931964 |
| Rnf152     | -0.286839922 | 0.001896337 | 721.5876847 |
| Rcan2      | -0.288943675 | 0.002787057 | 4843.507141 |
| Fchsd1     | -0.290139903 | 0.000652218 | 725.8925563 |
| Fam46a     | -0.291289346 | 0.00254699  | 144.651318  |
| Tmem163    | -0.293888935 | 0.00069968  | 1452.510202 |
| Etv1       | -0.294248781 | 2.58E-06    | 3057.471707 |
| LOC499781  | -0.295551986 | 0.00222858  | 185.5680812 |
| Chn2       | -0.297751823 | 0.000275985 | 1154.360664 |
| Hdac11     | -0.298056029 | 0.00010236  | 1388.623042 |
| Il3ra      | -0.29915161  | 0.000356778 | 658.3031545 |
| Cort       | -0.307081912 | 0.001255129 | 199.573852  |
| Rasip1     | -0.308561603 | 0.000232158 | 758.0603055 |
| RGD1310769 | -0.309027665 | 3.21E-05    | 2235.076835 |
| Hebp1      | -0.309263423 | 0.000796572 | 327.7390582 |
| Rgs6       | -0.312079489 | 0.000941844 | 412.5388685 |
| Scarf2     | -0.315247743 | 0.000717163 | 285.2182528 |
| Snx8       | -0.318217595 | 0.000148329 | 497.7414144 |
| Adcyap1    | -0.319921738 | 0.00010236  | 817.1034269 |
| Scly       | -0.324599813 | 2.57E-05    | 654.8930901 |
| Creg1      | -0.32536733  | 2.82E-05    | 1235.874134 |
| Nexn       | -0.327881859 | 0.000170926 | 843.8472542 |
| Maff       | -0.345781947 | 0.00022644  | 204.9295121 |
| Epha10     | -0.373745051 | 1.46E-05    | 514.4357831 |
| Lgr5       | -0.383027426 | 2.02E-05    | 171.8139932 |
| Sik1       | -0.459470757 | 8.34E-09    | 1542.23405  |
| Tpbg       | -0.464807337 | 5.50E-09    | 1877.34536  |
